# Supplementary material for: NFATc1 marks articular cartilage progenitors and negatively determines articular chondrocyte differentiation
Source: eLife. 2023 Feb 15;12:e81569. doi: 10.7554/eLife.81569 (PMC10076019; doi:10.7554/eLife.81569)
Supplement: Figure 1—source data 1. — For Figure 1B Quantification of GFP+ cells in articular cartilage of Nfatc1Cre;Rosa26mTmG/+ mouse knee at 8 weeks of age (%); Figure 1D Quantification of RFP+ cells in articular cartilage of Nfatc1CreERT2;Rosa26RFP/+ mouse knee at 2 weeks and 8 weeks of age after tamoxifen pulse for 5 consecutive days (%). [file elife-81569-fig1-data1.xlsx]

## Sheet: Fig. 1B-source data
Fig. 1B Quantification of GFP+ cells in articular cartilage of Nfatc1-Cre;Rosa26-mTmGfl/+ mouse knee at 8 weeks of age (%)
AC-tibial	AC-femoral
91.597	85.71
96.19	82.89
98.86	81.1
97.48	89.64
95.65	86.34

## Sheet: Fig. 1D-source data
Fig. 1D Quantification of RFP+ cells in articular cartilage of Nfatc1-CreERT2;Rosa26-RFPfl/+ mouse knee at 2 weeks and 8 weeks of age (%)
	AR-tibia			AR-femur
2 weeks	21.58	19.39	23.47	24.56	25.37	22.15
8 weeks	9.21	12.64	10.37	11.86	10.13	11.41
