# Supplementary material for: NFATc1 marks articular cartilage progenitors and negatively determines articular chondrocyte differentiation
Source: eLife. 2023 Feb 15;12:e81569. doi: 10.7554/eLife.81569 (PMC10076019; doi:10.7554/eLife.81569)
Supplement: Figure 3—figure supplement 1—source data 1. [file elife-81569-fig3-figsupp1-data1.xlsx]

## Sheet: Fig. S2A-source data
Fig. S2A Colony formation assay of GFP+ and GFP- cells at P5 with 100 cells plated in 6-well-plates and cultured for two weeks (colony numbers)
	GFP+						GFP-
100 cells	13	15	18	22	12	12	2	4	3	1	2	6
