# Supplementary material for: NFATc1 marks articular cartilage progenitors and negatively determines articular chondrocyte differentiation
Source: eLife. 2023 Feb 15;12:e81569. doi: 10.7554/eLife.81569 (PMC10076019; doi:10.7554/eLife.81569)
Supplement: Figure 3—source data 1. — For Figure 3B Colony formation assay of GFP+ and GFP- cells with 50 or 100 cells plated in 6-well-plates and cultured for 2 weeks (colony numbers); Figure 3C Maximum diameter of cell pellets (mm); Figure 3D Colony numbers of mineralization, Relative gene expression of Ibsp (2-△Ct) and Relative gene expression of Sp7 (2-△Ct); Figure 3E Colony numbers of adipogenesis, Relative gene expression of Fabp4 (2-△Ct), and Relative gene expression of Lpl (2-△Ct). [file elife-81569-fig3-data1.xlsx]

## Sheet: Fig. 3B-source data
Fig. 3B Colony formation assay of GFP+ and GFP- cells with 50 or 100 cells plated in 6-well-plates and cultured for two weeks (colony numbers)
	GFP+						GFP-
50 cells	9	6	10	4	9	11	0	0	0	0	2	1
100 cells	13	26	18	13	16	18	1	3	3	2	6	2

## Sheet: Fig. 3C-source data
Fig. 3C Maximum diameter of cell pellets (mm)
GFP+	GFP-
1	0.6
1.2	0.75
1.25	0.5
1.05	0.7
0.9	0.45
1.3	0.5
1.6	0.8
1.5	0.75
1.6	0.4

## Sheet: Fig. 3D-source data
Colony numbers of mineralization
	GFP+						GFP-
Non-induced	0	0	0	0	0	0	0	0	0	0	0	0
Induced	17	21	14	11	18	20	10	8	9	13	12	11
Relative gene expression of Ibsp (2^-△Ct)
	GFP+						GFP-
Non-induced	0.00123782	0.00217338	0.00158473	0.00150186	0.00260454	0.00120672	0.000414474	0.00122593	0.000886663	0.000720183	0.00165285	0.00115061
Induced	0.372653	0.162505	0.196862	0.331539	0.262951	0.131216	0.0792196	0.0163783	0.0178308	0.0100181	0.0155111	0.0232425
Relative gene expression of Sp7 (2^-△Ct)
	GFP+						GFP-
Non-induced	0.000232966	0.000388047	0.000460766	0.000168285	0.000529443	0.000209404	0.000223664	0.000121003	0.000121973	0.000132672	0.000103214	0.000192243
Induced	0.00248903	0.00225601	0.00221607	0.00204923	0.00186816	0.00322565	0.00220248	0.00198215	0.000400144	0.00218179	0.0016865	0.00111789

## Sheet: Fig. 3E-source data
Colony numbers of adipogenesis
	GFP+						GFP-
Non-induced	2	0	0	0	0	0	0	0	0	0	0	0
Induced	7	15	13	17	12	9	6	2	6	3	4	1
Relative gene expression of Fabp4 (2^-△Ct)
	GFP+						GFP-
Non-induced	0.818902	0.05932	0.638789	0.693714	0.0510828	0.563623	0.0144884	0.0174111	0.0278258	0.0137599	0.0169334	0.0234583
Induced	22.6185	42.9888	21.1508	24.945	42.5231	19.3862	7.07422	7.03426	16.01	5.94679	7.55832	16.06
Relative gene expression of Lpl (2^-△Ct)
	GFP+						GFP-
Non-induced	0.19678	0.0522107	0.244048	0.170762	0.0479995	0.196225	0.0288439	0.0130316	0.0212279	0.0252699	0.0124906	0.0200837
Induced	0.992496	1.55286	0.685578	1.0495	1.60481	0.566933	0.303866	0.27276	0.916769	0.299937	0.280796	0.818228
