# Supplementary material for: NFATc1 marks articular cartilage progenitors and negatively determines articular chondrocyte differentiation
Source: eLife. 2023 Feb 15;12:e81569. doi: 10.7554/eLife.81569 (PMC10076019; doi:10.7554/eLife.81569)
Supplement: Figure 5—source data 1. — For Figure 5A Relative gene expression of Nfatc1 (2-△△Ct); Figure 5B Relative gene expression of Acan, Col2a1, and Col10a1 (2-△△Ct); Figure 5C Quantification of alcian blue staining, Relative gene expression of Col2a1 and Col10a1 (2-△△Ct); Figure 5F Relative gene expression of Acan, Col2a1, and Col10a1 (2-△△Ct); Figure 5H CUT&RUN signal relative to input (Col2a1); Figure 5I Luciferase assay of transcriptional activity of Col2a1 after deleting or overexpressing NFATc1 in ATDC5 cells (relative unit). [file elife-81569-fig5-data1.xlsx]

## Sheet: Fig. 5A-source data
Fig. 5A Relative gene expression of Nfatc1 (2^-△△Ct)
d0	d10
1.23305	0.308192
0.899135	0.224209
0.901975	0.096529

## Sheet: Fig. 5B-source data
Relative gene expression of Acan (2^-△△Ct)			Relative gene expression of Col2a1 (2^-△△Ct)			Relative gene expression of Col10a1 (2^-△△Ct)
CRISPR-Vector	CRISPR-Nfatc1		CRISPR-Vector	CRISPR-Nfatc1		CRISPR-Vector	CRISPR-Nfatc1
0.742914	11.5649		0.879324	8.77214		0.925941	1.49292
1.03881	20.02		1.23027	13.705		0.9259	2.41075
1.29577	15.5456		0.924378	12.2829		1.16641	1.89906

## Sheet: Fig. 5C-source data
Quantification of alcian blue staining			Relative gene expression of Col2a1 (2^-△△Ct)			Relative gene expression of Col10a1 (2^-△△Ct)
Retro-GFP	caNFATc1		Retro-GFP	caNFATc1		Retro-GFP	caNFATc1
0.1085	0.0825		1.37687	0.107766		0.716031	0.332431
0.1095	0.0825		0.846435	0.232887		1.03963	0.589446
0.1225	0.0895		0.858052	0.190315		1.34335	0.454643
0.0975	0.0785
0.0965	0.0765
0.1005	0.0795

## Sheet: Fig. 5F-source data
Relative gene expression of Acan (2^-△△Ct)			Relative gene expression of Col2a1 (2^-△△Ct)			Relative gene expression of Col10a1 (2^-△△Ct)
Prrx1-Cre;Nfatc1fl/+	Prrx1-Cre;Nfatc1fl/fl		Prrx1-Cre;Nfatc1fl/+	Prrx1-Cre;Nfatc1fl/fl		Prrx1-Cre;Nfatc1fl/+	Prrx1-Cre;Nfatc1fl/fl
1.20515	21.9515		1.02847	14.1653		1.12786	2.70865
0.911539	21.1056		0.779917	12.6141		1.09764	3.4167
0.910297	17.4554		1.24669	10.0133		0.807763	3.78881
1.09726	25.4026		0.676917	8.61105		1.07692	5.43149
1.04208	28.3103		0.795366	9.49981		0.705301	3.14529
0.874557	25.0508		1.52772	10.2977		1.31657	4.69767

## Sheet: Fig. 5H-source data
CUT&RUN signal relative to input (Col2a1)
Isotype control	anti-NFATc1 antibody
0.0157696	0.187713
0.0162326	0.108697
0.05364	0.147964

## Sheet: Fig. 5I-source data
Luciferase assay of transcriptional activity of Col2a1 after deleting Nfatc1 in ATDC5 cells (relative unit)			Luciferase assay of transcriptional activity of Col2a1 after overexpressing Nfatc1 in ATDC5 cells (relative unit)
CRISPR-Vector	CRISPR-Nfatc1		Retro-GFP	caNFATc1
0.569503	1.72427		0.654711	0.135245
0.38595	1.29393		0.486755	0.100336
0.569916	1.22295		0.434801	0.299884
