# Supplementary material for: NFATc1 marks articular cartilage progenitors and negatively determines articular chondrocyte differentiation
Source: eLife. 2023 Feb 15;12:e81569. doi: 10.7554/eLife.81569 (PMC10076019; doi:10.7554/eLife.81569)
Supplement: Supplementary file 1. [file elife-81569-supp1.xlsx]

## Sheet: Sheet1
Table S1 Expression of cell surface markers in GFP+ and GFP- cells
ID	GeneName	GFP+ 1_fpkm	GFP+ 2_fpkm	GFP+ 3_fpkm	GFP- 1_fpkm	GFP- 2_fpkm	GFP- 3_fpkm
ENSMUSG00000030342	Cd9	65.2418	170.313	52.2568	22.2725	57.2659	142.392
ENSMUSG00000075602	Ly6a (Sca1)	70.7937	105.323	98.8949	37.1021	693.652	205.219
ENSMUSG00000032011	Thy1	140.713	303.384	254.772	151.456	651.903	319.451
ENSMUSG00000032420	Nt5e (Cd73)	1.72335	0.98143	5.23838	2.37732	0.32541	0.461917
ENSMUSG00000022636	Alcam (Cd166)	1.46618	2.50423	6.11753	3.38142	14.76	5.04135
ENSMUSG00000022661	Cd200	1.60253	1.65628	3.25457	1.73573	1.19436	3.20924
ENSMUSG00000027087	Itgav (Cd51)	54.1585	47.3684	54.47	86.9322	74.3628	49.1283
ENSMUSG00000030786	Itgam (Cd11b)	0	0	0.00726189	0	0	0
ENSMUSG00000026395	Ptprc (Cd45)	0.0327296	0.00983166	0.0306987	0.00677471	0.0299555	0.0277992
ENSMUSG00000020717	Pecam1 (Cd31)	0	0.0347712	0.0463043	0	0.0354188	0.207947
Data from transcriptome analyses (n = 3 mice per group). fpkm, fragments per kilobase of transcript sequence per million base pairs sequenced.
