# Supplementary material for: NFATc1 marks articular cartilage progenitors and negatively determines articular chondrocyte differentiation
Source: eLife. 2023 Feb 15;12:e81569. doi: 10.7554/eLife.81569 (PMC10076019; doi:10.7554/eLife.81569)
Supplement: Supplementary file 2. [file elife-81569-supp2.xlsx]

## Sheet: 工作表1
Table S2 Primer sequences for quantitative PCR
Gene	Forward primer	Reverse primer
Ibsp	AAAGTGAAGGAAAGCGACGA	GTTCCTTCTGCACCTGCTTC
Sp7	ATGGCGTCCTCTCTGCTTGA	GAAGGGTGGGTAGTCATTTG
Fabp4	AAGGTGAAGAGCATCATAACCCT	TCACGCCTTTCATAACACATTCC
Lpl	GGGAGTTTGGCTCCAGAGTTT	TGTGTCTTCAGGGGTCCTTAG
Nfatc1	CAACGCCCTGACCACCGATAG	GGCTGCCTTCCGTCTCATAGT
Acan	CTACAGAACAGCGCCATCAT	CTACAGAACAGCGCCATCAT
Col2a1	CGAGTGGAAGAGCGGAGAACT	AACTTTCATGGCGTCCAAGGT
Col10a1	TTCTGCTGCTAATGTTCTTGACC	GGGATGAAGTATTGTGTCTTGGG
Gapdh	TGCCAGCCTCGTCCCGTAGAC	CCTCACCCCATTTGATGTTAG
